# Supplementary material for: The influence of ligand field effects on the magnetic exchange of high-spin Co(ii)-semiquinonate complexes
Source: Royal Society of Chemistry journal article supplement (doi:10.1039/b508769d), 2005-10-28
Supplement: b508769d.pdf [file b508769d.pdf]

# Electronic Supplementary Data File

## The influence of ligand field effects on the magnetic exchange of high spin Co (II)- semiquinonate complexes

Alessandro Bencini,<sup>a</sup> Alessandra Beni,<sup>a</sup> Ferdinando Costantino,<sup>b</sup> Andrea Dei,<sup>a\*</sup> Dante Gatteschi,<sup>a</sup> Lorenzo Sorace<sup>a</sup>

<sup>a</sup> Udr INSTM and Dipartimento di Chimica, Università di Firenze, Via della Lastruccia 3 50019 Sesto Fiorentino (FI), Italy

*Fax:* +390554573372; *Tel:* +390554573328; *E-mail:* [andrea.dei@unifi.it](mailto:andrea.dei@unifi.it)

<sup>b</sup>UdR INSTM and Dipartimento di Chimica, Università di Perugia, Via Elce di Sotto 8, 06124 Perugia (Pg), Italy

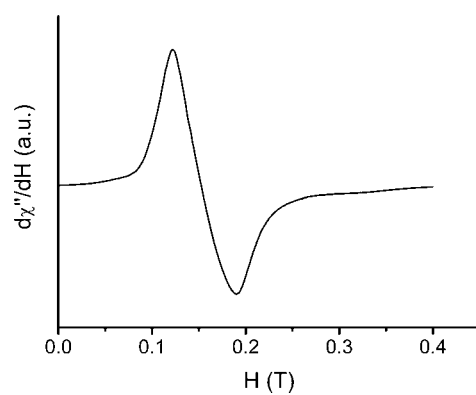

**Figure S1** X-Band (9.23 GHz) EPR spectrum of a powder sample of **1** measured at 4 K.  $g=2.00$  is occurring at 0.3300 T.

**Table S1.** Atomic coordinates and equivalent isotropic displacement parameters ( $\text{Å}^2 \times 10^3$ ) for **1**.  $U(\text{eq})$  is defined as one third of the trace of the orthogonalized  $U_{ij}$  tensor.

| Atom name | $x/a$      | $y/b$     | $z/c$      | $U_{eq}$ |
|-----------|------------|-----------|------------|----------|
| Co(1)     | 0.2875(1)  | 0.7424(1) | 0.1641(1)  | 31(1)    |
| Co(2)     | 0.3070(1)  | 0.2419(1) | 0.0661(1)  | 30(1)    |
| P(1)      | 0.1976(2)  | 0.5057(1) | 0.3789(1)  | 46(1)    |
| P(2)      | 0.1969(2)  | 0.4840(1) | -0.1552(1) | 51(1)    |
| F(2)      | 0.3020(5)  | 0.5334(4) | 0.3540(2)  | 88(2)    |
| F(3)      | 0.1634(7)  | 0.6040(3) | 0.3798(3)  | 115(2)   |
| F(4)      | 0.1232(6)  | 0.4942(4) | 0.3283(2)  | 96(2)    |
| F(5)      | 0.0952(4)  | 0.4764(3) | 0.4045(2)  | 77(2)    |
| F(6)      | 0.2293(6)  | 0.4049(4) | 0.3763(3)  | 114(2)   |
| F(7)      | 0.2755(6)  | 0.5131(6) | 0.4283(2)  | 154(4)   |
| F(8)      | 0.0989(5)  | 0.4845(3) | 0.1242(2)  | 80(2)    |
| F(9)      | 0.1114(6)  | 0.4758(4) | -0.2029(2) | 100(2)   |
| F(10)     | 0.1918(5)  | 0.5879(3) | -0.1597(2) | 88(2)    |
| F(11)     | 0.3001(6)  | 0.4856(4) | -0.1846(2) | 106(2)   |
| F(12)     | 0.2865(5)  | 0.4933(3) | -0.1081(2) | 79(2)    |
| O(4)      | 0.3264(4)  | 0.2030(3) | 0.1367(1)  | 36(1)    |
| O(1)      | 0.2629(4)  | 0.7982(3) | 0.0961(1)  | 43(1)    |
| O(3)      | 0.2039(4)  | 0.3283(3) | 0.0948(2)  | 40(1)    |
| O(2)      | 0.2140(5)  | 0.6420(3) | 0.1199(2)  | 52(1)    |
| N(1)      | 0.4593(7)  | 0.7126(5) | 0.1512(2)  | 40(2)    |
| N(2)      | 0.1182(6)  | 0.7712(5) | 0.1796(3)  | 43(2)    |
| N(3)      | 0.3344(7)  | 0.6494(5) | 0.2264(3)  | 47(2)    |
| N(4)      | 0.2428(6)  | 0.2852(4) | -0.0068(2) | 48(2)    |
| N(5)      | 0.4500(5)  | 0.1552(3) | 0.0511(2)  | 41(1)    |
| N(6)      | 0.1746(5)  | 0.1405(4) | 0.0522(2)  | 44(1)    |
| N(7)      | 0.4425(5)  | 0.3411(3) | 0.0803(2)  | 40(1)    |
| N(8)      | 0.3319(7)  | 0.8684(4) | 0.1999(2)  | 38(2)    |
| C(2)      | 0.2672(6)  | 0.2456(4) | 0.1639(2)  | 34(1)    |
| C(3)      | 0.1997(6)  | 0.3193(4) | 0.1396(2)  | 37(2)    |
| C(4)      | 0.1342(7)  | 0.3773(5) | 0.1629(3)  | 53(2)    |
| C(5)      | 0.1185(7)  | 0.3836(5) | 0.2095(3)  | 57(2)    |
| C(6)      | 0.1550(7)  | 0.3300(6) | 0.2483(3)  | 59(2)    |
| C(7)      | 0.2168(7)  | 0.2552(6) | 0.2469(3)  | 59(2)    |
| C(8)      | 0.2653(6)  | 0.2174(5) | 0.2098(2)  | 46(2)    |
| C(9)      | 0.1927(6)  | 0.6592(4) | 0.0756(2)  | 40(2)    |
| C(10)     | 0.2224(5)  | 0.7476(4) | 0.0613(2)  | 30(1)    |
| C(11)     | 0.1443(7)  | 0.5931(5) | 0.0436(3)  | 55(2)    |
| C(12)     | 0.1202(7)  | 0.5923(5) | -0.0054(3) | 59(2)    |
| C(13)     | 0.1335(6)  | 0.6545(5) | -0.0384(2) | 50(2)    |
| C(14)     | 0.1752(6)  | 0.7377(5) | -0.0287(2) | 44(2)    |
| C(15)     | 0.2108(6)  | 0.7776(4) | 0.0141(2)  | 40(2)    |
| C(18)     | 0.4283(10) | 0.6014(7) | 0.2092(5)  | 60(3)    |
| C(19)     | 0.5165(8)  | 0.6704(8) | 0.1940(4)  | 91(3)    |
| C(20)     | 0.5281(10) | 0.7932(8) | 0.1392(4)  | 56(3)    |
| C(21)     | 0.5249(9)  | 0.8706(7) | 0.1737(4)  | 84(3)    |
| C(22)     | 0.4051(8)  | 0.9180(5) | 0.1703(3)  | 57(2)    |
| C(23)     | 0.3819(10) | 0.8774(7) | 0.2524(3)  | 54(3)    |
| C(24)     | 0.2146(10) | 0.9133(6) | 0.1894(5)  | 110(5)   |
| C(25)     | 0.1319(8)  | 0.8455(6) | 0.2136(3)  | 79(3)    |
| C(26)     | 0.0635(10) | 0.6948(8) | 0.2023(4)  | 96(3)    |
| C(27)     | 0.2422(9)  | 0.5924(6) | 0.2281(3)  | 50(3)    |
| C(28)     | 0.4669(7)  | 0.3653(5) | 0.1313(2)  | 53(2)    |
| C(29)     | 0.4101(8)  | 0.4257(5) | 0.0547(3)  | 58(2)    |
| C(30)     | 0.3552(8)  | 0.4206(5) | 0.0027(3)  | 61(2)    |
| C(31)     | 0.5430(6)  | 0.3000(5) | 0.0663(3)  | 50(2)    |
| C(32)     | 0.2351(8)  | 0.3788(5) | -0.0064(3) | 64(2)    |
| C(33)     | 0.5471(6)  | 0.2042(4) | 0.0797(3)  | 46(2)    |

|                  |            |            |            |        |
|------------------|------------|------------|------------|--------|
| C(34)            | 0.1237(7)  | 0.2450(6)  | -0.0108(3) | 64(2)  |
| C(35)            | 0.4852(7)  | 0.1359(5)  | 0.0047(3)  | 55(2)  |
| C(36)            | 0.1279(7)  | 0.1500(5)  | 0.0009(3)  | 57(2)  |
| C(37)            | 0.4305(6)  | 0.0708(4)  | 0.0735(3)  | 47(2)  |
| C(38)            | 0.3254(7)  | 0.0230(4)  | 0.0491(3)  | 50(2)  |
| C(39)            | 0.2143(7)  | 0.494(5)   | 0.0643(3)  | 52(2)  |
| C(40)            | 0.0805(7)  | 0.1540(5)  | 0.0794(3)  | 57(2)  |
| C(42)            | 0.0402(7)  | 0.07941(6) | 0.1365(3)  | 71(3)  |
| C(43)            | 0.1373(10) | 0.6474(9)  | 0.2435(4)  | 68(3)  |
| C(46)            | 0.3805(11) | 0.6770(8)  | 0.2783(3)  | 66(3)  |
| Disordered group |            |            |            |        |
|                  |            |            |            |        |
| N(8B)            | 0.421(2)   | 0.844(2)   | 0.1922(9)  | 51(6)  |
| C(46B)           | 0.314(3)   | 0.729(2)   | 0.285(1)   | 46(7)  |
| N(2B)            | 0.150(2)   | 0.833(2)   | 0.1772(9)  | 52(6)  |
| N(3B)            | 0.258(3)   | 0.690(2)   | 0.234(1)   | 67(7)  |
| C(23B)           | 0.473(3)   | 0.860(2)   | 0.246(1)   | 51(7)  |
| N(1B)            | 0.428(2)   | 0.663(2)   | 0.1580(9)  | 54(7)  |
| C(18B)           | 0.416(2)   | 0.572(2)   | 0.174(1)   | 38(6)  |
| C(26B)           | 0.280(4)   | 0.966(3)   | 0.190(2)   | 81(11) |
| C(43B)           | 0.142(3)   | 0.722(2)   | 0.238(1)   | 57(8)  |
| C(27B)           | 0.404(4)   | 0.567(3)   | 0.226(2)   | 84(14) |
| C(20B)           | 0.525(3)   | 0.802(2)   | 0.164(1)   | 40(7)  |
| C(46c)           | 0.360      | 0.630      | 0.250      | 25     |
| C25b             | 0.08       | 0.780      | 0.20       | 25     |
| C22b             | 0.360      | 0.920      | 0.170      | 25     |
| C24b             | 0.180      | 0.920      | 0.210      | 25     |
| C19b             | 0.530      | 0.710      | 0.170      | 25     |
| C42b             | 0.110      | 0.830      | 0.130      | 25     |
| C17b             | 0.390      | 0.640      | 0.110      | 25     |
